# Supplementary material
Source: Elsevier journal article supplement (https://comptes-rendus.academie-sciences.fr/biologies/article/10.1016/j.crvi.2010.12.001/file/attach/mmc1.pdf)
Supplement: mmc1 [file mmc1.pdf]

Appendix I

| Plant species                                                                                     | Code    | A2    | A1    | C2    | A3    | C1    | Ca    | Sa    |
|---------------------------------------------------------------------------------------------------|---------|-------|-------|-------|-------|-------|-------|-------|
| <i>Peganum harmala</i> L.                                                                         | Pega    | 1     | 4.33  | 0.50  | 0     | 0     | 0.67  | 0     |
| <i>Suaeda vera</i> J.F. Gmel.                                                                     | Suae    | 95.33 | 2.67  | 5.33  | 0     | 0     | 0     | 0     |
| <i>Zygophyllum album</i> L. f.                                                                    | Zygo    | 2     | 7.33  | 35.33 | 0     | 0     | 0     | 0     |
| <i>Atriplex halimus</i> L.                                                                        | Atri    | 1     | 16.33 | 2     | 14.67 | 0     | 0     | 0     |
| <i>Mesembryanthemum nodiflorum</i> L.                                                             | Mesem   | 17    | 30    | 0.50  | 0.50  | 0     | 0     | 0     |
| <i>Salsola tetragona</i> Delile                                                                   | Salste  | 2     | 24.33 | 39.67 | 4     | 0     | 0     | 0     |
| <i>Salsola vermiculata</i> L.                                                                     | Salsve  | 5     | 97    | 3.33  | 4.33  | 0     | 1.67  | 3.67  |
| <i>Limoniastrum guyonianum</i> Boiss.                                                             | Limogu  | 0.50  | 0.50  | 2     | 0     | 0     | 0     | 0     |
| <i>Diplotaxis ollivieri</i> Maire                                                                 | Dipl    | 0.50  | 0.50  | 0.50  | 0     | 0     | 0     | 0     |
| <i>Lycium intricatum</i> Boiss. subsp. <i>intricatum</i>                                          | Lyci    | 0     | 0     | 0.50  | 0     | 0     | 0     | 0     |
| <i>Moricandia suffruticosa</i> (Desf.) Coss. & Dur.                                               | Mori    | 0     | 0     | 1.50  | 0     | 0     | 0     | 0     |
| <i>Cynodon dactylon</i> (L.) Pers.                                                                | Cyno    | 0     | 0     | 0.50  | 5.33  | 38    | 3.33  | 0     |
| <i>Launaea nudicaulis</i> (L.) Hook f.                                                            | Launnud | 0     | 0     | 0.50  | 0.50  | 0.80  | 0     | 0     |
| <i>Malva parviflora</i> L. subsp. <i>parviflora</i>                                               | Malv    | 0     | 0     | 0.50  | 9.67  | 1.20  | 0     | 0     |
| <i>Phalaris minor</i> Retz                                                                        | Phal    | 0     | 0     | 0.50  | 0     | 0.50  | 0     | 0     |
| <i>Phoenix dactylifera</i> L.                                                                     | Phoe    | 0     | 0     | 6.67  | 6.67  | 43.00 | 0     | 0     |
| <i>Schismus barbatus</i> (Loefl. ex L.) Thell. subsp. <i>barbatus</i>                             | Schi    | 0     | 0     | 0.50  | 0.50  | 0     | 0     | 0     |
| <i>Sonchus oleraceus</i> L.                                                                       | Sonc    | 0     | 0     | 0.50  | 0     | 1.80  | 0     | 0     |
| <i>Limonium sinuatum</i> (L.) Mill. subsp. <i>beaumerianum</i> (Maire) Sauv. & Vindt              | Limosi  | 0     | 0     | 0     | 0.50  | 0.50  | 0     | 0     |
| <i>Polycarphae robbairea</i> (Kuntze) Greuter & Burdet                                            | Poly    | 0     | 0     | 0     | 0.50  | 0.50  | 0     | 0     |
| <i>Chenopodium vulvaria</i> L.                                                                    | Chen    | 0     | 0     | 0     | 0.50  | 0     | 0     | 0     |
| <i>Solanum nigrum</i> L. subsp. <i>nigrum</i>                                                     | Sola    | 0     | 0     | 0     | 0.50  | 0     | 0     | 0     |
| <i>Phragmites australis</i> (Cav.) Steud. subsp. <i>australis</i>                                 | Phra    | 0     | 0     | 0     | 0     | 0.50  | 0     | 0     |
| <i>Eruca vesicaria</i> (L.) Cav. subsp. <i>vesicaria</i>                                          | Eruc    | 0     | 0     | 0     | 0     | 0.50  | 0     | 0     |
| <i>Avena sterilis</i> L. subsp. <i>sterilis</i>                                                   | Aven    | 0     | 0     | 0     | 0     | 0.50  | 0     | 0     |
| <i>Beta vulgaris</i> L. subsp. <i>maritima</i> (L.) Arcang                                        | Beta    | 0     | 0     | 0     | 0     | 0.50  | 0     | 0     |
| <i>Stipagrostis plumosa</i> (L.) Munro ex Anderson subsp. <i>seminuda</i> (Trin. & Rupr.) Scholtz | Arisplu | 0     | 0     | 0     | 0     | 0     | 1.33  | 0.67  |
| <i>Cleome amblyocarpa</i> Baratte & Murb.                                                         | Cleo    | 0     | 0     | 0     | 0     | 0     | 2.00  | 6.00  |
| <i>Astragalus armatus</i> Willd. subsp. <i>armatus</i>                                            | Astr    | 0     | 0     | 2.33  | 0     | 0     | 10.33 | 3.33  |
| <i>Echium humile</i> Desf.                                                                        | Echi    | 0     | 0     | 0     | 0     | 0     | 0.67  | 1.67  |
| <i>Launaea mucronata</i> (Forssk.) Muschl. subsp. <i>mucronata</i>                                | Launres | 0     | 0     | 0     | 0     | 0     | 0.67  | 5.33  |
| <i>Atractylis flava</i> Desf.                                                                     | Atrafl  | 0     | 0     | 0     | 0     | 0     | 1.67  | 0     |
| <i>Atractylis serratuloides</i> (Cass.) DC.                                                       | Atraser | 0     | 0     | 0     | 0     | 0     | 6.33  | 0     |
| <i>Lygeum spartum</i> L.                                                                          | Lyge    | 0     | 0     | 0     | 0     | 0     | 62.33 | 0     |
| <i>Plantago albicans</i> L. subsp. <i>albicans</i>                                                | Plan    | 0.50  | 0.5   | 1     | 0     | 0     | 32.67 | 0     |
| <i>Erodium</i> sp.                                                                                | Erod    | 0     | 0     | 0     | 0     | 0     | 1.67  | 0     |
| <i>Euphorbia cornuta</i> Pers.                                                                    | Euph    | 0     | 0     | 0     | 0     | 0     | 0.33  | 0     |
| <i>Fagonia glutinosa</i> Delile                                                                   | Fago    | 0     | 0     | 0     | 0     | 0     | 2.67  | 0     |
| <i>Filago desertorum</i> Delile                                                                   | Fila    | 0     | 0     | 0     | 0     | 0     | 1.33  | 0     |
| <i>Hammada scoparia</i> (Pomel) Ilji (= <i>Haloxylon articulatum</i> (Moq.) Bunge)                | Halo    | 0     | 0     | 0     | 0     | 0     | 0.33  | 0     |
| <i>Farsetia occidentalis</i> B.L.Burt                                                             | Farsham | 0     | 0     | 0     | 0     | 0     | 18    | 0     |
| <i>Ferula vesceritensis</i> Batt.                                                                 | Feru    | 0     | 0     | 0     | 0     | 0     | 0.33  | 0     |
| <i>Helianthemum lippii</i> (L.) Dum. Cours.                                                       | Heli    | 0     | 0     | 0     | 0     | 0     | 0.67  | 0     |
| <i>Silene villosa</i> Forssk.                                                                     | Sile    | 0     | 0     | 0     | 0     | 0     | 0.33  | 0     |
| <i>Linaria aegyptiaca</i> (L.) Dum. Cours.                                                        | Linar   | 0     | 0     | 0     | 0     | 0     | 0     | 12.33 |
| <i>Cymbopogon schoenanthus</i> (L.) Spreng. subsp. <i>schoenanthus</i>                            | Cymb    | 0     | 0     | 0     | 0     | 0     | 0     | 0.33  |
| <i>Lotus glinoides</i> Delile                                                                     | Lotus   | 0     | 0     | 0     | 0     | 0     | 0     | 6.67  |
| <i>Thymelaea microphylla</i> Coss. & Dur.                                                         | Thym    | 0     | 0     | 0     | 0     | 0     | 0     | 2.33  |
| <i>Ononis serrata</i> Forssk. subsp. <i>serrata</i>                                               | Onon    | 0     | 0     | 0     | 0     | 0     | 0     | 21.33 |

|                                                                                      |         |      |      |      |   |     |      |       |
|--------------------------------------------------------------------------------------|---------|------|------|------|---|-----|------|-------|
| <i>Stipa tenacissima</i> L.                                                          | Stipa   | 0    | 0    | 0    | 0 | 0   | 0    | 14.67 |
| <i>Onopordum arenarium</i> Pomel                                                     | Ono     | 0.50 | 0.50 | 1    | 0 | 0   | 0    | 32    |
| <i>Aristida obtusa</i> Delile                                                        | Arisob  | 0    | 0    | 0.50 | 0 | 0.5 | 0    | 2.33  |
| <u><i>Pergularia tomentosa</i> L.</u>                                                | Perg    | 0    | 0    | 0    | 0 | 0   | 0    | 3     |
| <u><i>Rhanterium adpressum</i> Coss. &amp; Dur.</u>                                  | Rhant   | 0    | 0    | 0    | 0 | 0   | 0    | 12.67 |
| <u><i>Farsetia aegyptia</i> Turra</u>                                                | Farsaeg | 0    | 0    | 0    | 0 | 0   | 0    | 3     |
| <u><i>Citrullus colocynthis</i> (L.) Schrad.</u>                                     | Coloc   | 0    | 0    | 0    | 0 | 0   | 0    | 0.50  |
| <u><i>Thuranthos noctiflorum</i> (Batt. &amp; Trab.) Speta (=Urginea noctiflora)</u> | Urgi    | 0    | 0    | 0    | 0 | 0   | 0    | 0.50  |
| <i>Picris asplenioides</i> L. <i>saharae</i> (Coss. & Kralik) Dobignard              | Picr    | 0    | 0    | 0    | 0 | 0   | 0    | 0.50  |
| <i>Nolletia chrysocomoides</i> (Desf.) Cass.                                         | Nolle   | 0    | 0    | 0    | 0 | 0   | 0    | 0.50  |
| <i>Haplophyllum tuberculatum</i> (Forssk.) Juss. (=Ruta tuberculata Forssk.)         | Ruta    | 0    | 0    | 0    | 0 | 0   | 0    | 0.50  |
| <i>Anabasis articulata</i> (Forssk.) Moq.                                            | Anab    | 0    | 0    | 1.50 | 0 | 0   | 1.33 | 0     |

The species having saharian affinities are underlined.
